# Supplementary material
Source: Elsevier journal article supplement (https://www.sciencedirect.com/science/article/pii/S1699258X19300804)
Supplement: mmc2 [file S1699258X19300804:mmc2.docx]

| **Anexo 2. Características de estudios incluidos y evaluación de calidad de evidencia según GRADE. (Tratamiento no farmacológico y quirúrgico) Autor, Año de publicación, Diseño** | **N, Número de estudios** | **Tratamiento** | **Resultados: Eficacia (1)** | **Calidad de la evidencia (GRADE) /**  **Nivel de la evidencia OCEBM** |
| --- | --- | --- | --- | --- |
| Pecourneau,2017  MA | 331,8 | **Programa de ejercicios**  **Natación**  **Pilates**  **Ejercicios supervisados** | BASDAI (MD -2.00; IC95% -1.52-0.27)*  BASFI (MD -0.72;IC95% -1.03,-0.40)* | Moderada/  1a(-) |
| Liang,2015  MA | 109,6 | **Programa de ejercicio en casa**  Comparador: Tratamiento convencional | BASDAI (MD -0.50; IC95% -0.99-0.02)*  BASFI (MD -0.39;IC95% -0.57,-0.20)* | Moderada/  1a(-) |
| Zao,2017  RS | 2515,35 | **Ejercicio acuático y terrestre**  La duración varía de 30 a 60 minutos, de una vez al día a una vez a la semana, de 3 semanas a 12 meses. | 9/12 estudios: Mejora significativa en BASFI  11/12 estudios: Mejora significativa BASDAI | Baja/  1a(-) |
| Cardoso,2017  ECA | 66 | **Pelota suiza**  2 veces a la semana  Comparador: Tratamiento convencional | BASFI (M3.36; DE±2.16 vs M3.90; DE±2.60)*  BASDAI (M2.08; DE±1.84 vs M2.12; DE±2.40)*  PCR (M9.27; DE±13.50 vs M4.51;DE±6.75)* | Baja/  1b(-) |
| Dragoi,2015  ECA | 54 | **Entrenamiento de músculos inspiratorios**  Comparador: Tratamiento convencional | EXPANCIÓN TORÁCICA (MC -0.8; IC95% -0.8, -0.7 vs MC -0.3; IC95% -0.4,-0.2)* | Moderada/  1b(-) |
| Site, 2016  ECA | 52 | **Ultrasonido con ejercicio**  Comparador: Placebo | BASDAI (MD2.32; DE±1.36 vs MD1.17; DE±1.72)*  BASFI (MD1.89; DE±1.39 vs MD1.33; DE±1.55)  EXPANSIÓN TORÁCICA (MD-0.96; DE±0.75 vs MD-0.94; DE±1.43)  PCR (MD-0.04; DE±0.69 vs MD-0.29;DE±1.20) | Baja/  1b(-) |
| Karahan, 2016  ECA | 60 | **Exergames**  Comparador: Sin ejercicio | BASFI, BASDAI mejoran significativamente a las 8 semanas, no sucede lo mismo en el grupo control | Baja/  1b(-) |
| Hu, 2016  MA | 539,9 | **PSO, PWO,SPO** | SPO VS PSO: CK (MD -8.74; -16.78-0.70)*  PWO VS PSO: CK (MD -0.38; -5.24,4.48)  SPO VS PWO: CK (MD -13.88; -18.51,-9.25)* | Baja/  1a(-) |
| Liu, 2015  MA | 302,5 | **SPO, PSO** | Sin diferencia significativa en SVA preoperatoria ( I 2 = 47%, MD −1.67 cm, P = 0.12) o SVA en seguimiento  (I 2 = 60%, MD− 1.79 cm, P = 0.06).  Sin diferencia significativa en corrección postoperatoria de SVA ( I 2 = 0%, MD = 0.62  cm, P = 0.36) o pérdida de SVA ( I 2 = 15%, MD 0.34 cm, P = 0.07) | Baja/  1a(-) |
